# Supplementary material for: Experimental and theoretical investigation of oxidative methane activation on Pd–Pt catalysts
Source: Royal Society of Chemistry journal article supplement (doi:10.1039/c9ra00735k), 2019-01-01
Supplement: c9ra00735k1.pdf [file c9ra00735k1.pdf]

1 *Supplementary material for:*

2

3 **Experimental and theoretical investigation of oxidative methane**  
4 **activation on Pt-Pt catalysts**

5 Wenjie Qi <sup>a,b,\*</sup>, Zehao Huang<sup>a</sup>, Lijuan Fu<sup>a</sup>, Hao Li<sup>c</sup>, Zhien Zhang <sup>b,1</sup>

6

7 <sup>a</sup> Key Laboratory of Advanced Manufacturing Technology for Automobile Parts,  
8 Ministry of Education, Chongqing University of Technology, Chongqing 400050,  
9 China

10 <sup>b</sup> Key Laboratory of Low-grade Energy Utilization Technologies and Systems,  
11 Ministry of Education of PRC, Chongqing University, Chongqing 400044, China

12 <sup>c</sup> Department of Chemistry and Institute for Computational and Engineering Sciences,  
13 The University of Texas at Austin, 105 E. 24th Street, Stop A5300, Austin, TX  
14 78712, USA

15 **1. XRD and metal cluster dispersion [1]**

---

\* Corresponding Author  
E-mail: [wenjieqi@cqut.edu.cn](mailto:wenjieqi@cqut.edu.cn) (Wenjie Qi); [zhienzhang@cqut.edu.cn](mailto:zhienzhang@cqut.edu.cn) (Zhien Zhang).

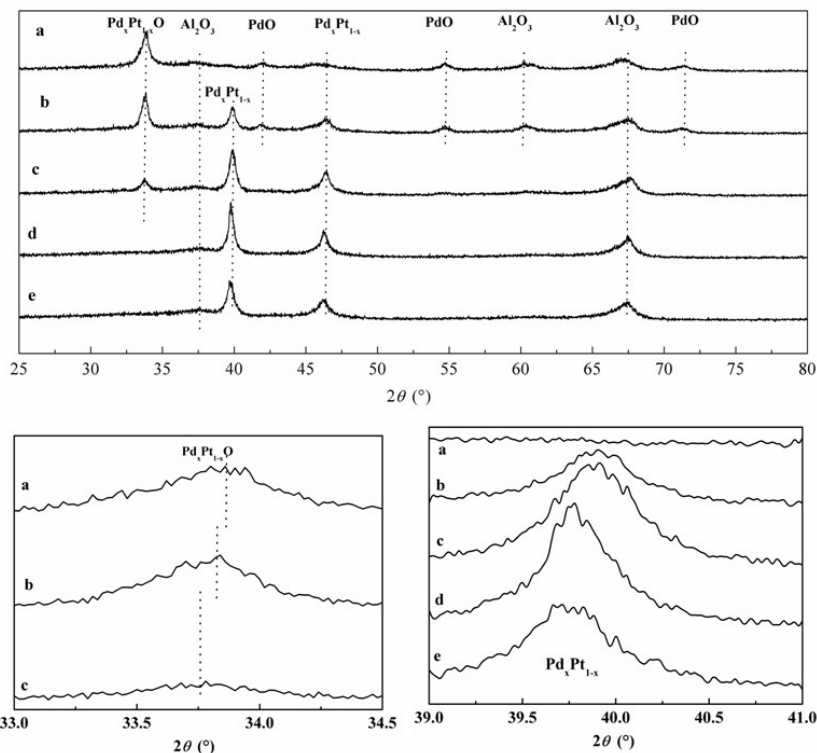

16

17 Fig. S1 XRD patterns of the catalysts samples (a) Pd<sub>1.0</sub>Pt<sub>0</sub>, (b) Pd<sub>0.75</sub>Pt<sub>0.25</sub>, (c) Pd<sub>0.5</sub>Pt<sub>0.5</sub>, (d)

18

Pd<sub>0.25</sub>Pt<sub>0.75</sub>, (e) Pd<sub>0</sub>Pt<sub>1.0</sub>.

19

20 Table S1 Metal loading, CO uptake and metal cluster dispersion of the different catalysts

| Sample                                | Composition | Pd loading (wt%) | Pt loading (wt%) | CO uptake (μmol (g <sup>-1</sup> catalysts)) | Pd-Pt dispersion (%)<br>from CO uptake |
|---------------------------------------|-------------|------------------|------------------|----------------------------------------------|----------------------------------------|
| Pd <sub>1.0</sub> Pt <sub>0</sub>     | 1:0         | 2.1              | 0                | 9.5                                          | 9.6                                    |
| Pd <sub>0.75</sub> Pt <sub>0.25</sub> | 0.75:0.25   | 1.6              | 0.9              | 11.3                                         | 9.3                                    |
| Pd <sub>0.50</sub> Pt <sub>0.50</sub> | 0.5:0.5     | 1.0              | 1.7              | 9.8                                          | 7.3                                    |
| Pd <sub>0.25</sub> Pt <sub>0.75</sub> | 0.25:0.75   | 0.6              | 2.6              | 10.0                                         | 6.2                                    |
| Pd <sub>0</sub> Pt <sub>1.0</sub>     | 0:1         | 0                | 3.4              | 15.0                                         | 8.8                                    |

21

22

23 **2. Kinetically relevant steps in CH<sub>4</sub>-O<sub>2</sub> reactions on surfaces of these catalysts.**

24 **Reaction orders for methane and oxygen can be calculated by fitting**

25 **experimental data.**

26 (1) On Pd catalyst.

$$27 \quad r_{II-III,Pd} = k_{II-III,app} (O_2)^{-0.15} (CH_4)^1 \quad P_{O_2} \leq 1.7kPa \quad (1)$$

$$28 \quad r_{IV,Pd} = k_{IV,app} (O_2)^0 (CH_4)^1 \quad 1.7kPa < P_{O_2} < 11kPa \quad (2)$$

$$29 \quad r_{V,Pd} = k_{V,app} (O_2)^0 (CH_4)^1 \quad P_{O_2} \geq 11kPa \quad (3)$$

30

31 (2) On Pd<sub>0.75</sub>Pt<sub>0.25</sub> catalyst

$$32 \quad r_{I,Pd_{0.75}} = k_{I,app} (O_2)^{1.1} (CH_4)^{0.1} \quad 0 < (O_2 / CH_4) < 0.08 \quad (4)$$

$$33 \quad r_{II,Pd_{0.75}} = k_{II,app} (O_2)^{-0.82} (CH_4)^{1.82} \quad 0.08 < (O_2 / CH_4) < 1 \quad (5)$$

$$34 \quad r_{IV,Pd_{0.75}} = k_{IV,app} (O_2)^0 (CH_4)^1 \quad P_{O_2} > 3 \sim 5kPa \quad (6)$$

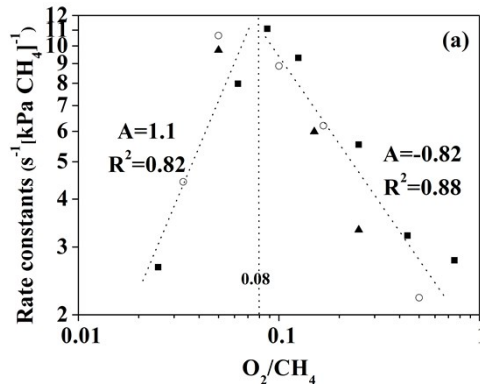

35

36 Fig. S2 First-order constant ( $r_{CH_4}(CH_4)^{-1}$ ) for methane oxidation as a single valued function of

37

$O_2/CH_4$  ratio on Pd<sub>0.75</sub>Pt<sub>0.25</sub>

38 (3) On Pd<sub>0.5</sub>Pt<sub>0.5</sub> catalyst

$$39 \quad r_{I,Pd_{0.5}} = k_{I,app} (O_2)^{1.0} \quad 0 < (O_2 / CH_4) < 0.1 \quad (7)$$

$$40 \quad r_{II,Pd_{0.5}} = k_{II,app} (O_2)^{-0.72} (CH_4)^{1.72} \quad 0.1 < (O_2 / CH_4) < 1 \quad (8)$$

$$41 \quad r_{IV,Pd_{0.5}} = k_{IV,app} (O_2)^0 (CH_4)^1 \quad P_{O_2} > 4 \sim 6kPa \quad (9)$$

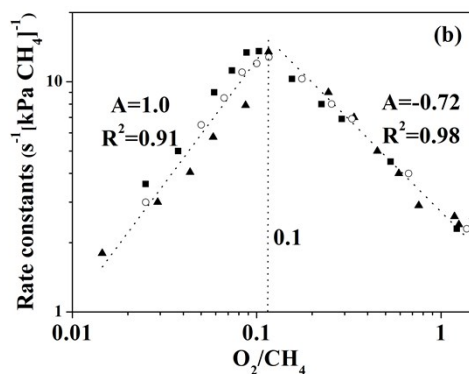

42

43 Fig. S3 First-order constant ( $r_{\text{CH}_4}(\text{CH}_4)^{-1}$ ) for methane oxidation as a single valued function of

44

$\text{O}_2/\text{CH}_4$  ratio on  $\text{Pd}_{0.5}\text{Pt}_{0.5}$

45

46 (4) On  $\text{Pd}_{0.25}\text{Pt}_{0.75}$  catalyst

$$47 \quad r_{I, \text{Pd}_{0.25}} = k_{I, \text{app}} (\text{O}_2)^{1.0} \quad 0 < (\text{O}_2 / \text{CH}_4) < 0.1 \quad (10)$$

$$48 \quad r_{II, \text{Pd}_{0.25}} = k_{II, \text{app}} (\text{O}_2)^{-0.72} (\text{CH}_4)^{1.72} \quad 0.1 < (\text{O}_2 / \text{CH}_4) < 1.1 \quad (11)$$

$$49 \quad r_{IV, \text{Pd}_{0.25}} = k_{IV, \text{app}} (\text{O}_2)^{0.1} (\text{CH}_4)^1 \quad P_{\text{O}_2} > 5 \sim 7 \text{ kPa} \quad (12)$$

50

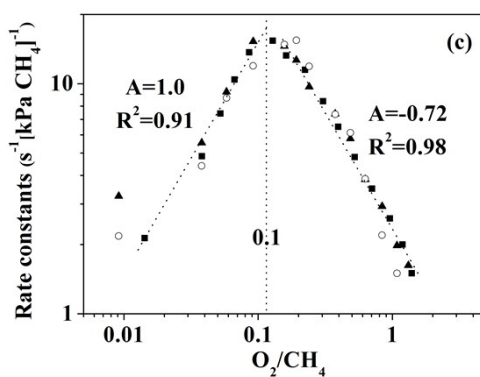

51

52 Fig. S4 First-order constant ( $r_{\text{CH}_4}(\text{CH}_4)^{-1}$ ) for methane oxidation as a single valued function of

53

$\text{O}_2/\text{CH}_4$  ratio on  $\text{Pd}_{0.25}\text{Pt}_{0.75}$

54

55 (5) On Pt catalyst

56 
$$r_{I,Pt} = k_{I,app} (O_2)^{1.1} (CH_4)^{-0.1} \quad 0 < (O_2 / CH_4) < 0.12 \quad (13)$$

57 
$$r_{II,Pt} = k_{II,app} (O_2)^{2.38} (CH_4)^{-1.38} \quad 0.1 < (O_2 / CH_4) < 2 \sim 3 \quad (14)$$

58 
$$r_{III,Pt} = k_{III,app} (CH_4)^1 \quad 2 \sim 3 < (O_2 / CH_4) \quad (15)$$

59

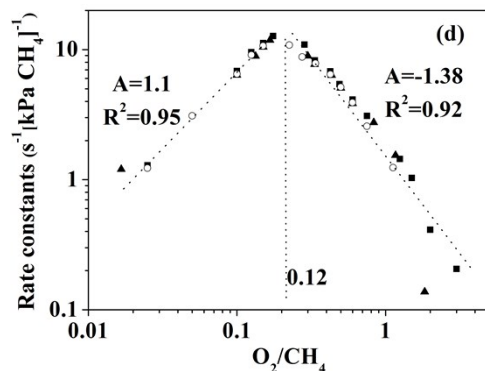

60

61 Fig. S5 First-order constant ( $r_{CH_4}(CH_4)^{-1}$ ) for methane oxidation as a single valued function of

62

$O_2/CH_4$  ratio on Pt

63 **3. Arrhenius plots of first order rate constants for methane combustion on Pd,**

64 **Pt and Pd-Pt catalysts**

65

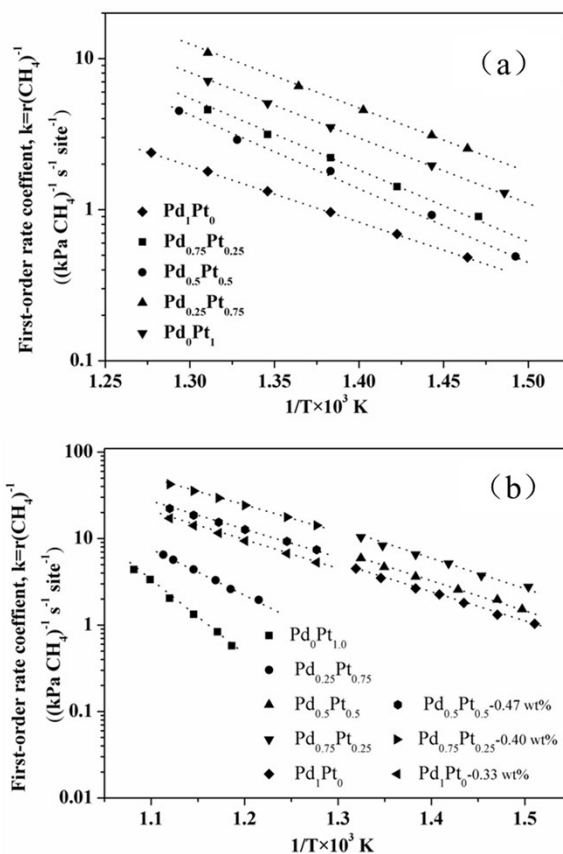

66  
 67 Fig.S6. Arrhenius plots of the methane first order rate coefficient versus  $1000/T$  for methane  
 68 combustion on different catalysts. (a) Oxygen pressure at 2 kPa for  $\text{Pd}_{0.75}\text{Pt}_{0.25}$ ,  $\text{Pd}_{0.5}\text{Pt}_{0.5}$ ,  
 69  $\text{Pd}_{0.25}\text{Pt}_{0.75}$  and  $\text{Pt}_{1.0}$ , and 0.5 kPa for  $\text{Pd}_{1.0}$ ; (b) Oxygen pressure at 20 kPa for all catalysts. R-  
 70 square for these experimental data are larger than 0.93.

71  
 72 **4. Binding energies of the adsorption O on different metal surface with different**  
 73 **O coverage**

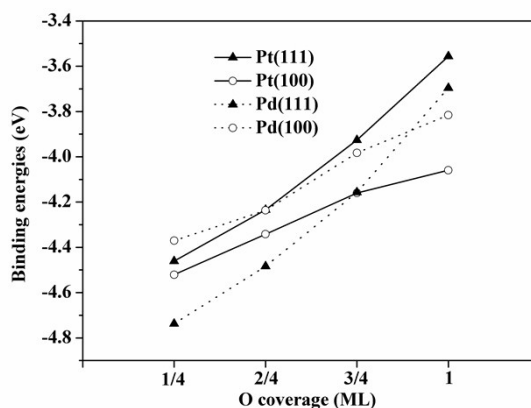

74  
 75  
 76 Fig. S7 Binding energies of the adsorption O on different metal surface with different O  
 77 coverage

78 **5. Structures of reactant, transition states and product for O<sub>2</sub> dissociation on**  
 79 **the Pt(111) and Pd(111) covered with different O coverage.[2]**

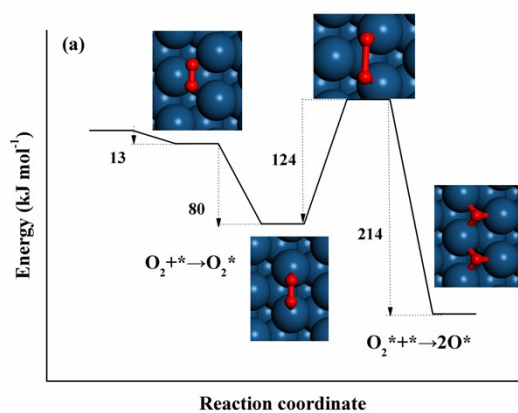

80

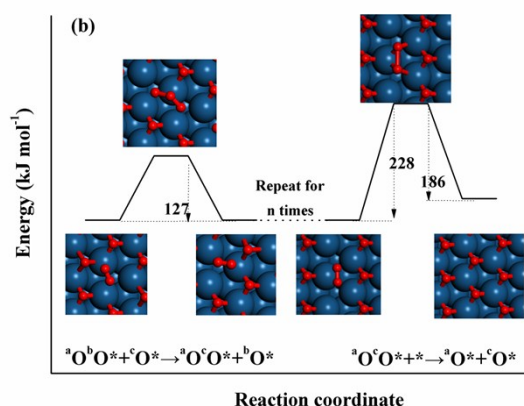

81

82 Fig. S8 (a) Reaction coordinate and structures of reactant, transition state, and product for O<sub>2</sub>  
 83 dissociation on a bare Pt (111) facet. (b) Reaction coordinate and structures of reactant,  
 84 transition state, intermediate, and product for O<sub>2</sub> dissociation on the (111) facet of Pt nearly  
 85 saturated with chemisorbed oxygen atoms. a,b, and c are used to differentiate the O atoms  
 86 involved in the steps

87

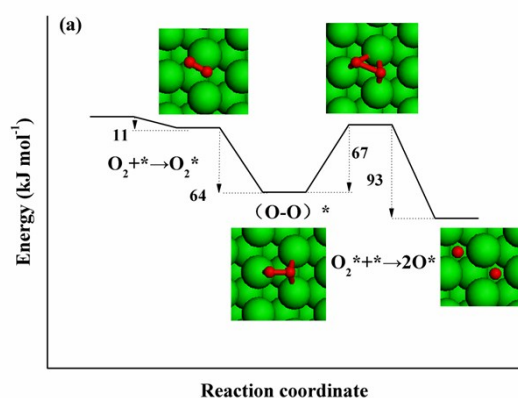

88

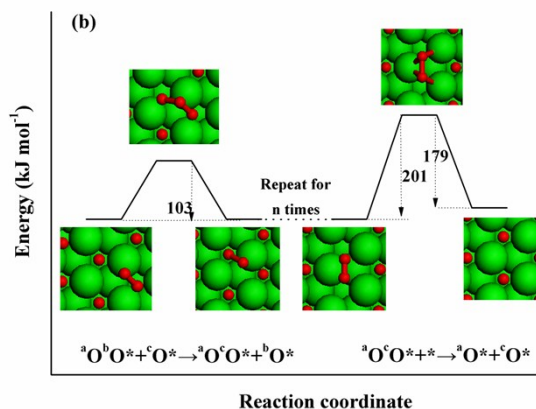

89

90 Fig. S9 (a) Reaction coordinate and structures of reactant, transition state, and product for O<sub>2</sub>

91 dissociation on a bare Pd (111) facet. (b) Reaction coordinate and structures of reactant,

92 transition state, intermediate, and product for O<sub>2</sub> dissociation on the (111) facet of Pd nearly

93 saturated with chemisorbed oxygen atoms. a,b, and c are used to differentiate the O atoms

94 involved in the steps

95

96 6. Structures of reactant, transition states and product for CH<sub>4</sub> dissociation on

97 (a) MeO(111), (b) 1/4 ML O, (c) 3/4 ML O and (d) 1 ML O coverage on

98 Me(111) surfaces, (e) PdO(101)/Pt(100) and (f) PdO(101).



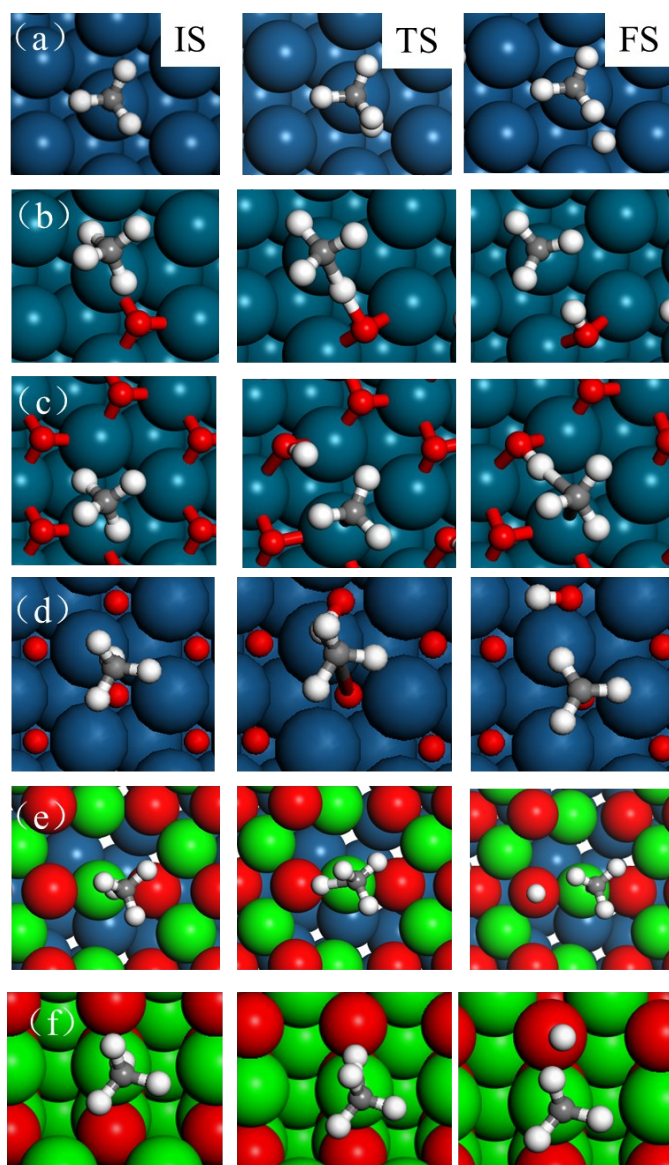

99

100 Fig. S10 Structures of reactant, transition states and product for  $\text{CH}_4$  dissociation on  
 101 (a) MeO(111), (b) 1/4 ML O, (c) 3/4 ML O and (d) 1 ML O coverage on Me(111)  
 102 surfaces, (e) PdO(101)/Pt(100) and (f) PdO(101). (a), (d), (e), (f) were from our  
 103 previous study[2].

104

105 7. **Parameters include bond length of transition states, activation energies and**  
 106 **binding energies for  $\text{CH}_4$  dissociation on the different oxygen potential**  
 107 **surfaces.**

| Catalyst                   | Bond length (Å)   |          |       |       | Activation energies (kJ mol <sup>-1</sup> ) | Binding energies (eV) |        |        |
|----------------------------|-------------------|----------|-------|-------|---------------------------------------------|-----------------------|--------|--------|
|                            | Transition states |          |       |       |                                             | [Site]                |        |        |
|                            | C-H               | Me (H-C) | Me-H  | H-O   |                                             | CH <sub>3</sub>       | H      |        |
| 0 ML O                     | Pd(111)           | 1.607    | 2.233 | 1.665 | 83                                          | -2.253                | -3.812 |        |
|                            | Pt(111)           | 1.634    | 2.336 | 1.670 | 78                                          | -2.435                | -3.720 |        |
|                            | Pd/PtPd(111)      | 1.598    | 2.231 | 1.673 | 79                                          | -2.319                | -3.805 |        |
|                            | Pt/PtPd(111)      | 1.582    | 2.343 | 1.667 | 75                                          | -2.513                | -3.744 |        |
| 1/4 ML O                   | Pd(111)           | 1.401    | 2.430 | 2.153 | 1.385                                       | 105                   | -2.314 | -4.022 |
|                            | Pt(111))          | 1.350    | 2.333 | 2.086 | 1.424                                       | 118                   | -2.586 | -3.981 |
| 3/4 ML O                   | Pd(111)           | 1.601    | 2.730 | 2.553 | 1.029                                       | 135                   | -1.640 | -4.381 |
|                            | Pt(111)           | 1.312    | 2.352 | 2.123 | 1.521                                       | 147                   | -2.197 | -4.628 |
|                            | Pd/PtPd(111)      | 1.623    | 2.803 | 2.532 | 1.123                                       | 139                   | -1.562 | -4.210 |
|                            | Pt/PtPd(111)      | 1.289    | 2.413 | 2.231 | 1.483                                       | 152                   | -2.180 | -4.395 |
| 1 ML O                     | Pd(111)           | 2.925    | 1.478 |       | 1.135                                       | 163                   | -1.164 | -4.730 |
|                            | Pt(111)           | 3.251    | 1.574 |       | 1.423                                       | 175                   | -0.921 | -4.656 |
|                            | Pd/PtPd(111)      | 2.932    | 1.468 |       | 1.186                                       | 159                   | -1.212 | -4.742 |
|                            | Pt/PtPd(111)      | 3.158    | 1.564 |       | 1.398                                       | 178                   | -0.889 | -4.642 |
| PdO (101) /Pt(100)         | 1.338             | 2.311    | 1.926 | 1.336 | 110                                         | -2.451                | -2.252 |        |
| 2 layer PdO (101) /Pt(100) | 1.320             | 2.155    | 1.913 | 1.276 | 67                                          | -2.688                | -1.956 |        |
| PdO(101)                   | 1.331             | 2.241    | 1.852 | 1.284 | 61                                          | -2.704                | -1.942 |        |

108

109 **8. Derivation of methane combustion rates limited by O<sub>2</sub> pressure on \*-\* site**

110 **pairs**

111 
$$2r_1 = k_{1.2f}\theta_{O_2}\theta_* = 2k_{2.1}P_m\theta_*^2 \quad (16)$$

112 
$$2r_1 = k_{1.2f}K_{1.1}P_O\theta_*^2 = 2k_{2.1f}P_m\theta_*^2 \quad (17)$$

113 
$$\theta_* = 1 \quad (18)$$

114 
$$r_1 = 0.5k_{1.2f}K_{1.1}P_O \quad (19)$$

115 **9. Derivation of methane combustion rates limited by C-H bond activation on**

116 **O\*-\* site pairs**

$$117 \quad 2r_2 = k_{1,2f}K_{1,1}P_O\theta_*^2 = 2k_{2,2f}P_m\theta_*\theta_O \quad (20)$$

$$118 \quad \frac{\theta_*}{\theta_O} = \frac{2k_{2,2f}P_m}{k_{1,2f}K_{1,1}P_O} \quad (21)$$

$$119 \quad \theta_* = \frac{1}{1 + \frac{\theta_O}{\theta_*}} = \frac{1}{1 + \frac{k_{1,2f}K_{1,1}P_O}{2k_{2,2f}P_m}} \quad (22)$$

$$120 \quad r_2 = \frac{2k_{2,2f}^2 P_m^2}{k_{1,2f}K_{1,1} P_O} \quad (23)$$

121 **10. Derivation of methane combustion rates limited by C-H bond activation on**

122 **O\*-O\* site pairs**

$$123 \quad r_3 = k_{2,3f}P_m\theta_*^2 \quad (24)$$

$$124 \quad \theta_O = 1 \quad (25)$$

$$125 \quad r_3 = k_{2,3f}P_m \quad (26)$$

126 **11. Derivation of methane combustion rates limited by C-H bond activation on**

127 **Pd-O site pairs**

$$128 \quad r_4 = k_{2,4f}P_m\theta_{V_O}\theta_* \quad (27)$$

$$129 \quad \theta_* \approx \theta_{V_O} = 1 \quad (28)$$

$$130 \quad r_4 = k_{2,4f}P_m \quad (29)$$

131

132 **References:**

133 [1] W. Qi, J. Ran, X. Du, R. Wang, J. Shi, J. Niu, P. Zhang, M. Ran, Kinetics Consequences of  
134 Methane Combustion on Pd, Pt and Pd-Pt Catalysts, Rsc Advances, 6 (2016) 109834-109845.

135 [2] W. Qi, J. Ran, Z. Zhang, J. Niu, P. Zhang, L. Fu, B. Hu, Q. Li, Methane combustion reactivity  
136 during the metal→metallic oxide transformation of Pd-Pt catalysts: Effect of oxygen pressure,  
137 Applied Surface Science, 435 (2017) 776-785.
